# Supplementary material
Source: PubMed Central journal article supplement (PMC9838103)
Supplement: NIHMS1828871-supplement-Supplementary_Table_1.pdf [file NIHMS1828871-supplement-Supplementary_Table_1.pdf]

**Supplementary Table 1.** Dosing of Proton Pump Inhibitors

| Proton pump inhibitor | Starting dose <sup>a</sup> | Maximal dose |
|-----------------------|----------------------------|--------------|
| Pantoprazole          | 40 mg qd                   | 40 mg bid    |
| Lansoprazole          | 15 mg qd                   | 30 mg bid    |
| Omeprazole            | 20 mg qd                   | 40 mg bid    |
| Esomeprazole          | 20 mg qd                   | 40 mg bid    |
| Dexlansoprazole       | 30 mg qd                   | 60 mg qd     |
| Rabeprazole           | 20 mg qd                   | 20 mg bid    |

Note: Once-daily dose optimally taken 30 to 60 minutes before breakfast; twice-daily dose taken 30 to 60 minutes before breakfast and dinner.

Note: Adapted from reference 22. Maximal doses reported based on doses used in clinically published studies

*bid*, Twice-daily; *qd*, once-daily.

<sup>a</sup>In order of potency based on omeprazole equivalents.
